# Supplementary material for: A Thioredoxin Domain-Containing Protein Interacts with Pepino mosaic virus Triple Gene Block Protein 1
Source: MDPI journal article supplement (doi:10.3390/ijms19123747), 2018-11-25
Supplement: s1 [file s1]

# A Thioredoxin Domain-Containing Protein Interacts with *Pepino mosaic virus* Triple Gene Block Protein 1

Matthaios M. Mathioudakis, Souheyla Khechmar, Carolyn A. Owen, Vicente Medina, Karima Ben Mansour, Weronika Tomaszewska, Theodore Spanos, Panagiotis F. Sarris and Ioannis C. Livieratos

**Table S1.** Primer pairs used for cloning and sub-cloning of *SITXND9* and for real-time PCR quantitation of *NbTXND9* mRNA expression

| <b>Primer pair name</b> | <b>-F</b>                            | <b>-R</b>                          |
|-------------------------|--------------------------------------|------------------------------------|
| <i>SITXND9</i> -G       | ATGGAGAATGCGGTTCAAGAGA               | CTCCGAGTCGCACGAGTCG                |
| <i>SITXND9</i> -EXP     | <b>GGATCCCATGGAGAATGCGGTTCAAGAGA</b> | <b>CTCGAGCTCCGAGTCGCACGAGTCG</b>   |
| <i>SITXND9</i> -YFP     | <b>GGATCCCATGGAGAATGCGGTTCAAGAGA</b> | <b>GGCGCGCCCTCCGAGTCGCACGAGTCG</b> |
| <i>SITXND9</i> -MAL     | <b>GGATCCCATGGAGAATGCGGTTCAAGAGA</b> | <b>CTGCAGCTCCGAGTCGCACGAGTCG</b>   |
| <i>NbSITXND9</i> -q     | TTGTAAAGGCTAGTGACCGTGTT              | CTATATGCTGTTTTGCCAGTATGC           |

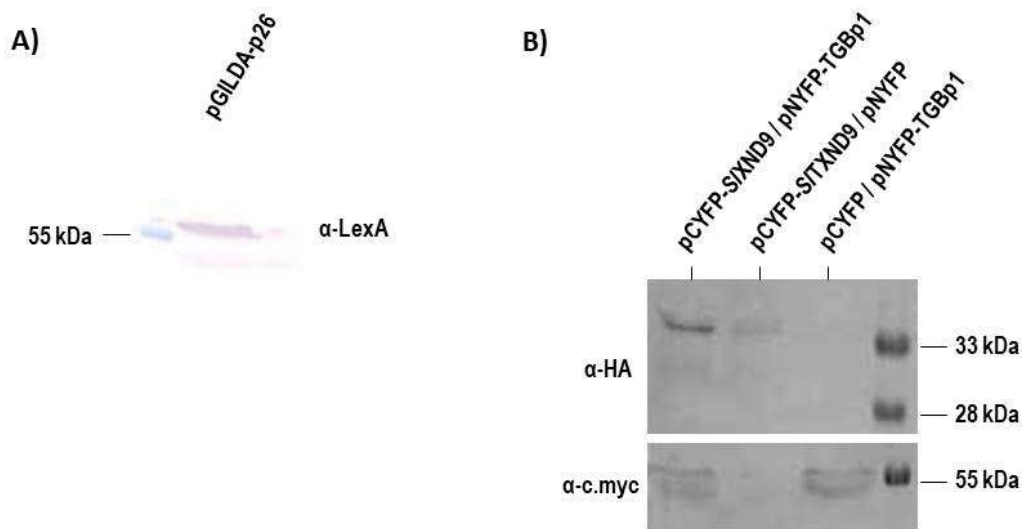

**Figure S1.** Immunoblot analysis of the fusion proteins *LexA-TGBp1*, *CYFP-SITXND9* and *NYFP-TGBp1*. **(A)** Immunoblot analysis to confirm the expression of the *LexA-TGBp1* fusion protein (the expression product of plasmid pGILDA-p26) in yeast. This construct was used as the bait to screen the tomato cDNA library subcloned into the pJG4-5 vector. Western blot of SDS-PAGE resolved total proteins from pGILDA-p26-transformed *Saccharomyces cerevisiae* EGY48 cells probed with  $\alpha$ -LexA antiserum revealed a fusion protein of the expected size (58 kDa). **(B)** Immunoblot analysis to detect the *Agrobacterium*-mediated transient expression of *CYFP-SITXND9* and *NYFP-TGBp1* in *Nicotiniana benthamiana* plants for the bimolecular fluorescent complementation assay (BiFC). Total protein extracts from *N. benthamiana* leaves co-infiltrated with pSPYNE-35S-TGBp1 (encoding *NYFP-TGBp1*, 55kDa) and pSPYCE-35S-*SITXND9* (encoding *CYFP-SITXND9*, 35 kDa), or each fusion separately in conjunction with the empty vector encoding the complementary YFP fragment, harvested at 3 days post-inoculation (dpi), were used to produce western blots that were probed with either  $\alpha$ -c-myc (pSPYNE) or  $\alpha$ -HA (pSPYCE) that recognize the affinity tags on the fusion proteins, to confirm their expression.

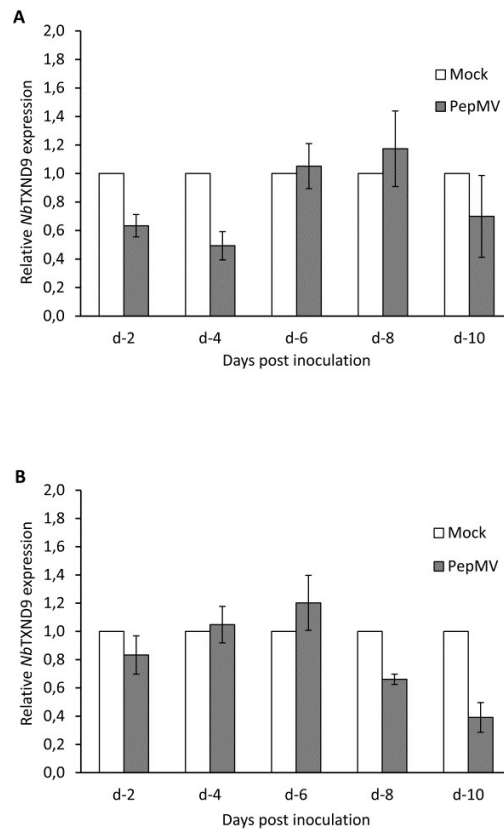

**Figure S2.** Accumulation of SITXND9 mRNA in PepMV- and mock-inoculated *Nicotiniana benthamiana* plants. *N. benthamiana* plants were inoculated with PepMV or mock-inoculated, and the *NbTXND9* mRNA expression levels were evaluated by quantitative RT-PCR in locally-inoculated (**A**) or systemically-infected apical (**B**) leaves at 2, 4, 6, 8, 10 dpi. The expression of the housekeeping gene Elongation Factor 1a was used as a normalization control.

The mean values from three independent experiments are presented with the mean value of the mock-inoculated expressed as 1. Error bars represent standard deviation ( $\pm$ ) of the mean values.

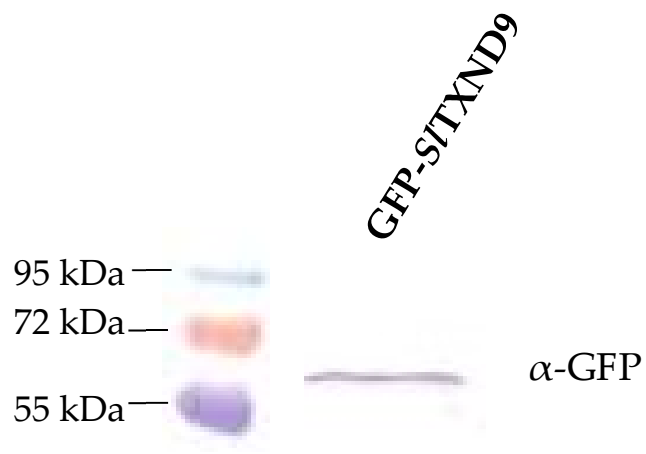

**Figure S3.** Immunoblot analysis to detect the agrobacterium-transiently expressed GFP-SITXND9 fusion protein in total protein extracts from *N. benthamiana* plants.
